# Supplementary material for: Investigation into the Production of Melanin from By-Products of Huangjiu Brewing
Source: MDPI journal article supplement (doi:10.3390/foods13193063), 2024-09-26
Supplement: s1 [file foods-3206366-supplementary.pdf › foods-3206366-supplementary.pdf]

## Supplementary

Table S1. ITS universal primer sequence

| Primer | Sequences (5'→3')    |
|--------|----------------------|
| ITS1   | TCCGTAGGTGAACCTGCGG  |
| ITS4   | GCTGCGTTCTTCATCGATGC |

Table S2. Primers used in this study

| Gene ID     | Name   | Sequence (5' to 3')    |
|-------------|--------|------------------------|
| <i>FKS</i>  | FKS-F  | AGAAGACCGAGAAGGACACTGC |
|             | FKS-R  | TCTGAGAACGGAGCGATGCC   |
| <i>PKS</i>  | PKS-F  | AAGCCTGAGGAGAAGCTCCAC  |
|             | PKS-R  | CTGCTGGGGAATGTGGACATT  |
| <i>Cmr1</i> | Cmr1-F | GGTCACTCGTTCACCAGGGA   |
|             | Cmr1-R | TGGAATTAGCCCGAGTTCTGAA |

Table S3. Comparison of melanin yield, color value and pullulan yield before and after adaptive evolution

| Generation | Melanin yield (g/L) | Color value | Pullulan yield (g/L) |
|------------|---------------------|-------------|----------------------|
| 0          | 5.91±0.21           | 108±2       | 5.06±0.35            |
| 1          | 5.96±0.18           | 108±4       | 5.09±0.26            |
| 2          | 6.05±0.22           | 108±2       | 5.18±0.23            |
| 3          | 6.23±0.26           | 109±3       | 5.36±0.12            |
| 4          | 6.59±0.18           | 109±2       | 5.62±0.24            |
| 5          | 6.89±0.24           | 110±2       | 6.02±0.21            |
| 6          | 7.02±0.19           | 110±1       | 6.65±0.20            |
| 7          | 7.94±0.19           | 111±2       | 7.22±0.21            |
| 8          | 8.72±0.25           | 112±3       | 7.22±0.18            |
| 9          | 8.07±0.31           | 110±1       | 7.20±0.14            |
| 10         | 8.06±0.26           | 110±3       | 7.15±0.22            |
